# Supplementary material for: Molecular clutch drives cell response to surface viscosity
Source: PubMed Central journal article supplement — Proc Natl Acad Sci U S A. 2018 Jan 22;115(6):1192–7. doi: 10.1073/pnas.1710653115 (PMC5819391; doi:10.1073/pnas.1710653115), 2018-01-22
Supplement: pnas.201710653SI.pdf [file pnas.201710653SI.pdf]

# Supporting Information

Bennett et al. 10.1073/pnas.1710653115

## SI Materials and Methods

**Preparation of Small Unilamellar Vesicles.** DOPC and DPPC were used as the fluid phase and gel phase, respectively (Avanti Polar Lipids). The desired amount of lipid, in chloroform, was mixed at a 98:2 mol % ratio with b-cap-PE [1,2-dioleoyl-*sn*-glycero-3-phosphoethanolamine-*N*-(cap biotinyl); Avanti Polar Lipids] and evaporated under N<sub>2</sub> gas. Excess chloroform was removed by drying under vacuum for ≥1 h.

Lipids were rehydrated in rehydration buffer (150 mM NaCl and 10 mM Tris, pH 7.4) to a concentration of 2 mg/mL and allowed to swell above their transition temperature (DOPC T<sub>m</sub> = -19 °C, DPPC T<sub>m</sub> = 41 °C) for 1 h and extruded through a 50-nm polycarbonate membrane (above their T<sub>m</sub>) and stored for a maximum of 1 wk.

**Preparation of Glass Surfaces.** Glass coverslips were cleaned by immersion in 5:1:1 solution of H<sub>2</sub>O:NH<sub>4</sub>:H<sub>2</sub>O<sub>2</sub> at 65 °C for 20 min and were dried under a stream of N<sub>2</sub> gas. Polydimethylsiloxane (PDMS) was prepared in a ratio of 9:1 ratio of elastomer to cross-linker and degassed for 20 min before curing for 2 h. PDMS wells were cut out and the PDMS bonded to the cleaned glass using a handheld plasma device on the surfaces for 20 s. The resulting wells were sterilized by exposure to UV light for 20 min and stored in a sealed, sterile container until use.

**Production and Functionalization of SLBs and Glass Control.** To produce SLBs, vesicles were diluted in to “fusion buffer” (300 mM NaCl, 10 mM Tris, 10 mM MgCl<sub>2</sub>) to 0.1 mg/mL under sterile conditions immediately before use and kept at either RT (DOPC) or at 70 °C (DPPC). The glass-bottomed PDMS wells were activated by cleaning with oxygen plasma (Zepto; Diener Electronic) at 75 W for 10 min and exposed to UV light for 5 min to ensure sterility. DOPC and DPPC lipid vesicles were incubated under sterile conditions for 20 min at RT and 70 °C, respectively. Samples were washed with sterile fusion buffer and ultrapure water of the same temperature.

An immobile control was also prepared first by silanizing previously produced glass-bottomed PDMS with 2% (3-aminopropyl) trimethoxysilane in propan-2-ol (Sigma-Aldrich) for 1 h. Samples were then washed and cured at 100 °C overnight and sterilized under UV light for 20 min. Surfaces were incubated with 1 mg/mL of an NHS-biotin cross-linker (biotinamidocaproate *N*-hydroxysuccinimide ester; Sigma-Aldrich) for 1 h and washed thoroughly with ultrapure water.

Both surfaces were functionalized with 0.1 mg/mL neutravidin (Fisher Scientific) and subsequently biotinylated cyclic-RGD peptide (Peptides International) for 15 min each and washed with ultrapure water after each step.

**Quantification of SLB Properties.** The presence of SLBs in both cases was confirmed via AFM in contact and force mapping mode in ultrapure water (Nanowizard 3 Bioscience AFM; JPK), with cantilevers of nominal spring constant of 0.32 N/m and resonant frequency of 67 kHz (PNP-TR-Au; Nanoworld). For force mapping the relative set point was set to 20 nN with an approach velocity of 1 μm/s. Measurements were taken in an 8 × 8, 5- × 5-μm<sup>2</sup> grid.

Diffusion coefficients of lipid bilayers were performed via FCS using a Becker and Hickl DCS-120 confocal scanning system, with an excitation laser of 480 nm and emission filter of 535 nm. For this purpose TopFluor-PE lipid [23-(dipyrrrometheneboron difluoride)-24-norcholesterol and 1-palmitoyl-2-(dipyrrrometheneboron difluoride) undecanoyl-*sn*-glycero-3-phosphoethanolamine; Avanti Polar Lipids]

was used at 0.01 mol % for DOPC and 0.5 mol % for DPPC. The resulting data were fitted to Eq. S1:

$$G(\tau) = \frac{1}{N} \frac{1}{(1 + \tau/\tau_D)}, \quad \text{[S1]}$$

where  $G(\tau)$  is the correlation factor,  $N$  the average number of diffusing molecules,  $\tau$  the correlation time, and  $\tau_D$  the diffusion time. The diffusion time and previously calibrated beam width was then applied to Eq. S2 and used to determine the diffusion coefficient of the SLBs:

$$\tau_D = \omega^2/4D, \quad \text{[S2]}$$

where  $\omega$  is the beam radius and  $D$  is the diffusion coefficient.

The amount of neutravidin on the surface was quantified using a previously described quantitative fluorescent microscopy technique. Briefly, bulk DOPC vesicle and neutravidin, both containing a Texas Red fluorescent label (TR-DHPE lipid; Molecular Probes and Texas Red Neutravidin; ThermoFisher) were used to create a scaling factor between fluorescent signals. This was then applied to a DOPC SLB containing different concentrations of TR-DHPE per square micrometer to determine the assumed amount of neutravidin per square micrometer, based on a given fluorescence.

**Culturing and Staining of C2C12 Mouse Myoblasts.** For adhesion experiments C2C12 mouse myoblast cells were seeded at 5,000 cells per square centimeter in DMEM (high glucose, [-]pyruvate, 1% penicillin/streptomycin, and 1% fungizone) for 3 h. For differentiation experiments, samples were seeded with 20,000 cells per square centimeter and incubated in said media with 1% insulin-transferrin-selenium for 4 d, with the media changed at day 2.

Samples were then washed in PBS, fixed with 4% paraformaldehyde, and permeabilized with 0.1% Triton X-100. Before staining samples were blocked with 1% BSA for 1 h. Primary antibodies used were antivinculin (1:400, mouse monoclonal), anti-pFAK (1:200), anti-YAP (1:100, mouse monoclonal; Santa Cruz Biotechnologies), and antisarcomeric myosin (1:250, MF-20b; DSHB). Primary antibodies were incubated for 1 h and washed extensively with PBS. The samples were then blocked with 1% BSA for 1 h and incubated with secondary antibodies for 1 h and washed extensively. Secondary antibodies used were Cy3 rabbit anti-mouse (1:100; Jackson ImmunoResearch), Alexa Fluor 488 goat anti-mouse (1:100; Molecular Probes), rhodamine phalloidin (1:100; Molecular Probes), and Alexa Fluor 488 phalloidin (1:100; Molecular Probes). DAPI containing mounting media was used to stain the nuclei.

Images were taken with a Zeiss Observer.Z1 using Mirco-Manager software. Image processing and analysis was performed using Fiji imaging software. Differentiation levels were calculated using the CellC Counter MATLAB extension to determine the percentage of nuclei staining positive for sarcomeric myosin.

**Determining Actin Flow.** C2C12 cells were transfected using the Neon transfection system (ThermoFisher Scientific) and performed as described by their cell specific protocol. Plasmids used were LifeAct-RFP, LifeAct-GFP (Ibidi) to label actin and the pEGFPC1/GgVcl 1-258 (aka VD1) plasmid was a gift from Susan Craig (Addgene plasmid no. 46270) (44). Transformed cells were cultured for 24 h and used.







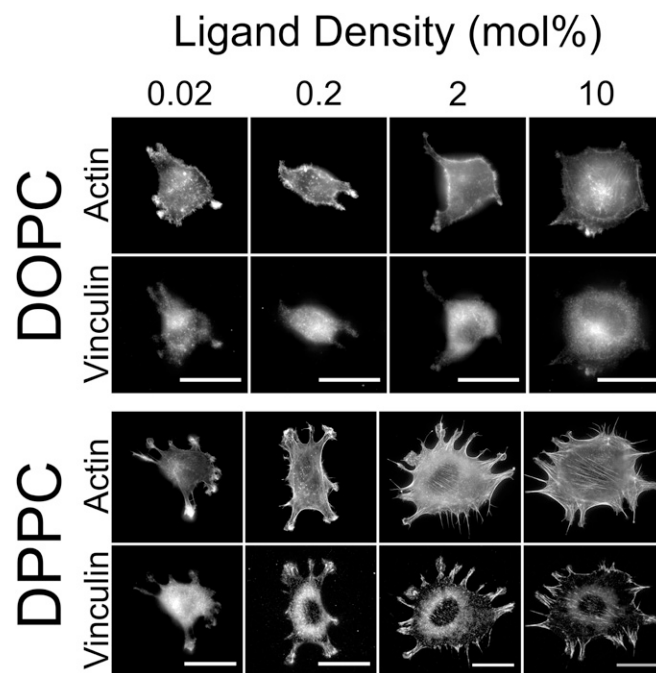

**Fig. S5.** Representative images of cells on DOPC and DPPC upon the alteration of the ligand density. The actin and vinculin stains used to quantify cell area and FA size in Figs. 3 and 5, respectively, are shown. (Scale bars: 25  $\mu\text{m}$ .)

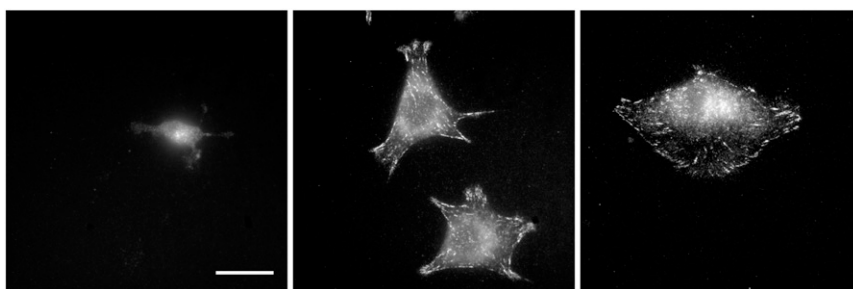

**Fig. S6.** Staining of representative images of pFAK on DOPC, DPPC, and RGD-glass (from left to right). (Scale bar: 25  $\mu\text{m}$ .)

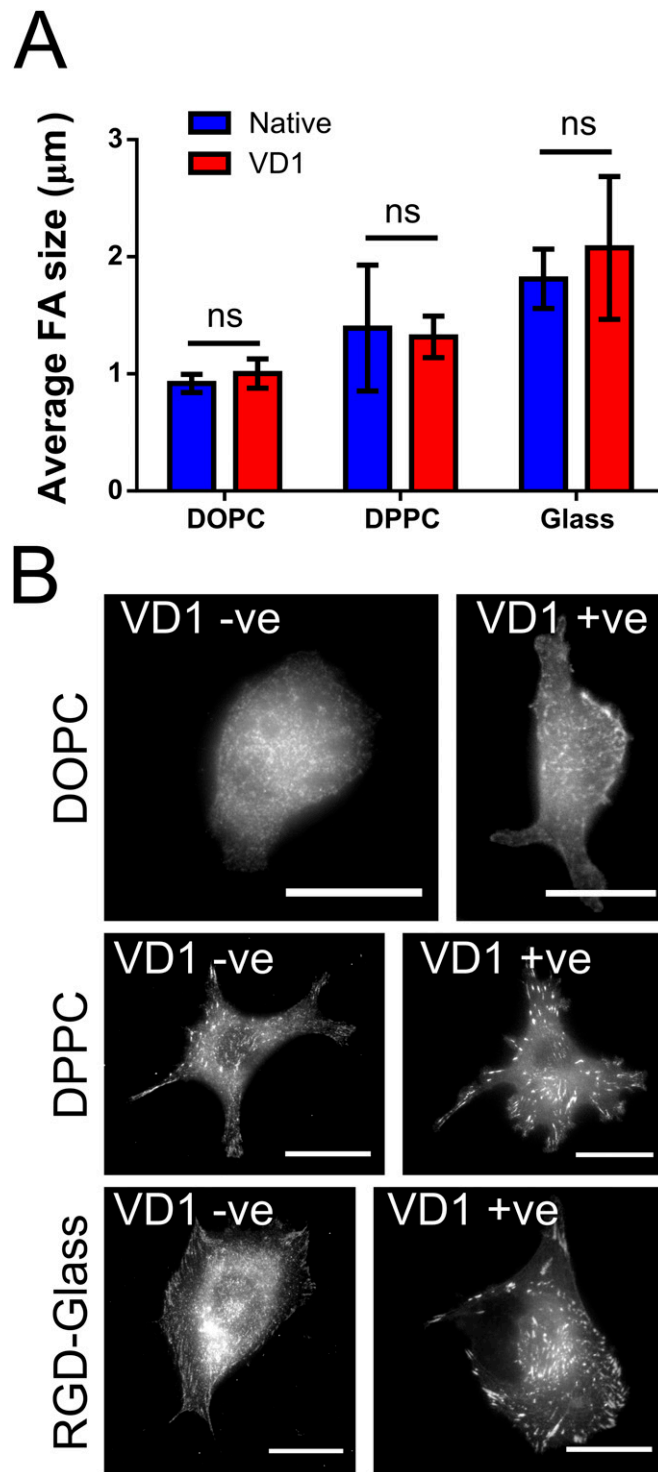

**Fig. S7.** (A) Upon transfection with VD1, encoding for the vinculin head group, there was no change in FA size between transfected (indicated as VD1 +ve) and native (VD1 -ve) cells. In VD1-positive cells this equates to difference between actin flow on the different viscosity surfaces. Representative images are shown in B. (Scale bars: 25  $\mu\text{m}$ .)



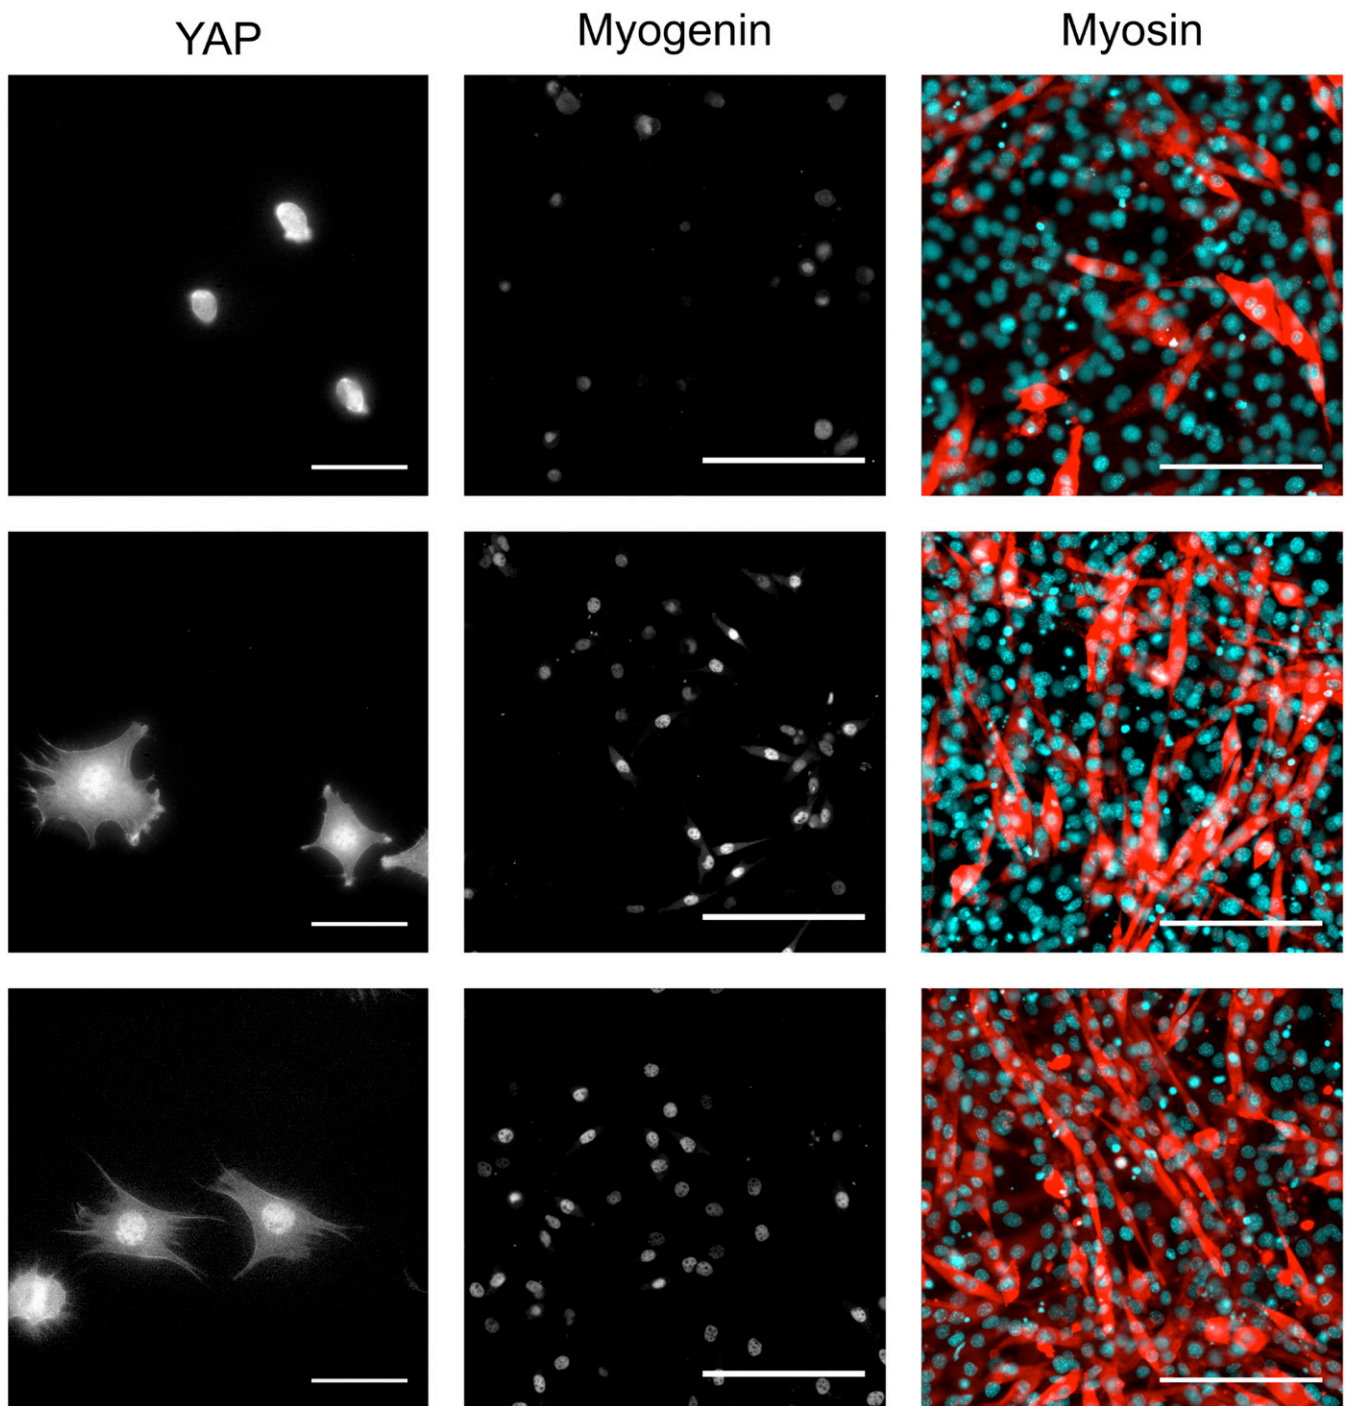

**Fig. S8.** An array of representative images of the relevant staining on each of the surfaces. Sarcomeric myosin is stained red and the nuclei are blue. (YAP scale bar: 50  $\mu\text{m}$ ; myogenin and sarcomeric myosin scale bars: 150  $\mu\text{m}$ .)

**Table S1. Model parameters**

| Parameter       | Meaning                                                                  | Value                                     | Origin                                                                       |
|-----------------|--------------------------------------------------------------------------|-------------------------------------------|------------------------------------------------------------------------------|
| $n_m$           | No. of myosin motors                                                     | 100                                       | Adjusted                                                                     |
| $n_l$           | No. of ligands                                                           | 75                                        | Adjusted                                                                     |
| $F_m$           | Myosin motor stall force                                                 | 2 pN                                      | (53)                                                                         |
| $v_u$           | Unloaded myosin motor velocity                                           | 110 nm/s                                  | (16, 17)                                                                     |
| $d_{int}$       | Initial integrin density on the membrane                                 | 300 per square micrometer                 | (16)                                                                         |
| $d_{intmax}$    | Maximum integrin density on the membrane                                 | 1,000 per square micrometer               | Adjusted                                                                     |
| $K_{ont}$       | True binding rate                                                        | $1 \times 10^{-4} \mu\text{m}^2/\text{s}$ | Adjusted, of the order of values reported for $\alpha\text{IIb}\beta_3$ (54) |
| $K_{off}$       | Unbinding rate, scaling factor applied to force curve reported in ref. 1 | 0.5                                       | Adjusted, catch bond dependency from ref. 54                                 |
| $F_{threshold}$ | Threshold reinforcement force                                            | 90 pN                                     | Adjusted, of the order of reported values (55)                               |
| $d_{add}$       | Integrins added after each reinforcement event                           | 6 per square micrometer                   | Does not affect model output                                                 |

All parameter values are of the same order as those employed in previous simulations considering elasticity rather than viscosity (59, 21, and 51).
